# Supplementary material for: Interscallop separations of the posterior mitral valve leaflet: a solution to the ‘borderline RHD’ conundrum?
Source: PubMed Central journal article supplement — Open Heart. 2020 Nov 5;7(2):e001452. doi: 10.1136/openhrt-2020-001452 (PMC7646362; doi:10.1136/openhrt-2020-001452), 2020-11-05
Supplement: openhrt-2020-001452supp001.pdf [file openhrt-2020-001452supp001.pdf]

**Supplementary material****Addendum A****World Heart Federation criteria for echocardiographic diagnosis of rheumatic heart disease**

|                                                                                   |
|-----------------------------------------------------------------------------------|
| <b>For definite RHD (either A,B,C or D)</b>                                       |
| A: Pathological MR and $\geq 2$ morphological features of RHD of the MV           |
| B: MS (mean gradient $\geq 4$ mmHg)                                               |
| C: Pathological AR and $\geq 2$ morphological features of RHD of the AV           |
| D: Borderline disease of both the MV and AV                                       |
| <b>For borderline RHD (either A, B or C)</b>                                      |
| A: $\geq 2$ morphological features of RHD of the MV without pathological MR or MS |
| B: Pathological MR                                                                |
| C: Pathological AR                                                                |
| <b>Echocardiographic criteria for pathological regurgitation</b>                  |
| <b>Doppler echocardiographic criteria for MR (all four must be met)</b>           |
| 1. Seen in two views                                                              |
| 2. In at least one view, jet length $\geq 2$ cm                                   |
| 3. Velocity $\geq 3$ m/s for one complete envelope                                |
| 4. Pan-systolic jet in at least one envelope                                      |
| <b>Doppler echocardiographic criteria for AR (all four must be met)</b>           |
| 1. Seen in two views                                                              |
| 2. In at least one view, jet length $\geq 1$ cm                                   |
| 3. Velocity $\geq 3$ m/s for one complete envelope                                |
| 4. Pan-diastolic jet in at least one envelope                                     |
| <b>Echocardiographic criteria for morphological features of RHD</b>               |
| <b>Features in the MV</b>                                                         |
| • AMVL thickening $\geq 3$ mm                                                     |
| • Chordal thickening                                                              |
| • Restricted leaflet motion                                                       |
| • Excessive leaflet tip motion during systole                                     |
| <b>Features in the AV</b>                                                         |
| • Irregular or focal thickening                                                   |
| • Coaptation defect                                                               |
| • Restricted leaflet motion                                                       |
| • Prolapse                                                                        |

MR, mitral regurgitation; MV, mitral valve; MS, mitral stenosis; AR, aortic regurgitation; AV, aortic valve; RHD, rheumatic heart disease
